# Supplementary material for: Fetal MRI-Based Mediastinal Shift Angle (MSA) and Percentage Area of Left Ventricle (pALV) as Prognostic Parameters for Congenital Diaphragmatic Hernia
Source: MDPI journal article supplement (doi:10.3390/jcm13010268), 2024-01-03
Supplement: s1 [file s1]

Table S1. Basic patient information.

| Patient number | Gender (f=female, m=male) | Maturity at birth (GA) | GA MRI appointment | Side of hernia | Liver position | MSA   | Volume right lung (ml) | Volume left lung (ml) | o/e FLV (%) | Mediastinal volume (cm3) | Thoracal volume (cm3) | FETO (1= no, 2=yes) | ECMO (ja=1, nein=2, contraindication=3) | ECMO duration (days) | Survival (1= no, 2= yes) | Days of life until death |
|----------------|---------------------------|------------------------|--------------------|----------------|----------------|-------|------------------------|-----------------------|-------------|--------------------------|-----------------------|---------------------|-----------------------------------------|----------------------|--------------------------|--------------------------|
| 1              | m                         | 36+4                   | 29+5               | rechts         | up             | left  | 1                      | 13,1                  | 26,2        | 9,5                      | 111,82                | 1                   | 1                                       | 10,04                | 1                        | 10,3                     |
| 2              | f                         | 39+0                   | 28+0               | rechts         | up             | left  | 1                      | 7,3                   | 18,3        | 9,09                     | 64,03                 | 1                   | 1                                       | 8,83                 | 2                        |                          |
| 3              | m                         | 36+6                   | 32+1               | rechts         | up             | left  | 0,41                   | 14,7                  | 22,4        | 21,62                    | 176,31                | 1                   | 1                                       | 8,79                 | 2                        |                          |
| 4              | f                         | 39+1                   | 24+6               | rechts         | down           | left  | 9                      | 11,3                  | 62,8        | 13,98                    | 61,99                 | 1                   | 2                                       |                      | 2                        |                          |
| 5              | f                         | 37+4                   | 28+4               | rechts         | up             | left  | 2,3                    | 7,5                   | 20,4        | 8,07                     | 88,01                 | 1                   | 1                                       | 8                    | 2                        |                          |
| 6              | f                         | 37+0                   | 29+3               | rechts         | up             | left  | 7,7                    | 16,3                  | 45,8        | 16,56                    | 68,44                 | 1                   | 2                                       |                      | 2                        |                          |
| 7              | m                         | 38+1                   | 32+4               | rechts         | up             | left  | 1,5                    | 14,3                  | 22,6        | 15,32                    | 149,55                | 1                   | 1                                       | 8                    | 2                        |                          |
| 8              | m                         | 37+3                   | 32+2               | rechts         | up             | left  | 8,1                    | 15,6                  | 34,7        | 30,24                    | 197,94                | 1                   | 1                                       | 13                   | 1                        | 28                       |
| 9              | f                         | 39+2                   | 30+3               | links          | up             | left  | 1,3                    | 13,8                  | 26,2        | 13,85                    | 109,34                | 1                   | 1                                       | 9                    | 2                        |                          |
| 10             | f                         | 38+0                   | 34+0               | rechts         | up             | left  | 1,53                   | 10,80                 | 15,6        | 21,53                    | 86,8                  | 1                   | 3                                       |                      | 1                        | 1                        |
| 11             | m                         | 37+5                   | 28+4               | links          | up             | left  | 7,6                    | 9,3                   | 28,93       | 27,22                    | 71,45                 | 1                   | 1                                       | 16                   | 2                        |                          |
| 12             | m                         | 38+4                   | 37+0               | links          | up             | right | 20,8                   | 2,1                   | 22,7        | 21,03                    | 169,81                | 1                   | 2                                       |                      | 2                        |                          |
| 13             | m                         | 39+0                   | 38+6               | links          | up             | right | 7,7                    | 1,3                   | 7,8         | 15,79                    | 190,47                | 1                   | 1                                       | 20                   | 1                        | 24                       |
| 14             | m                         | 38+4                   | 35+0               | links          | up             | right | 22,1                   | 3,4                   | 29,7        | 41,18                    | 202,03                | 1                   | 2                                       |                      | 2                        |                          |
| 15             | m                         | 38+0                   | 25+6               | links          | up             | right | 11,8                   | 2,8                   | 40,3        | 7,91                     | 62,53                 | 1                   | 1                                       | 6,83                 | 1                        | 34                       |
| 16             | f                         | 37+6                   | 31+6               | links          | down           | right | 33,4                   | 24,4                  | 88          | 21,59                    | 122,86                | 1                   | 2                                       |                      | 2                        |                          |
| 17             | f                         | 40+2                   | 32+1               | links          | up             | right | 24,7                   | 2,2                   | 39,9        | 19,41                    | 131,24                | 1                   | 2                                       |                      | 2                        |                          |
| 18             | f                         | 38+1                   | 31+2               | links          | up             | right | 16,4                   | 1,8                   | 29,2        | 13,23                    | 94,31                 | 1                   | 2                                       |                      | 2                        |                          |
| 19             | f                         | 38+4                   | 25+6               | links          | down           | right | 11,8                   | 3                     | 40,9        | 9,74                     | 60,56                 | 1                   | 2                                       |                      | 2                        |                          |
| 20             | m                         | 37+4                   | 31+1               | links          | up             | right | 17,9                   | 1,7                   | 31,8        | 15,88                    | 101,91                | 1                   | 1                                       | 5,42                 | 2                        |                          |
| 21             | m                         | 37+4                   | 31+4               | links          | down           | right | 27,3                   | 5,5                   | 51,3        | 20,33                    | 149,04                | 1                   | 2                                       |                      | 2                        |                          |
| 22             | m                         | 35+4                   | 31+4               | links          | up             | right | 9,8                    | 0,1                   | 15,1        | 19,02                    | 153,58                | 1                   | 1                                       | 8                    | 2                        |                          |
| 23             | m                         | 36+5                   | 36+5               | links          | down           | right | 45                     | 20                    | 65,9        | 36,52                    | 239,71                | 1                   | 2                                       |                      | 2                        |                          |
| 24             | m                         | 39+3                   | 32+1               | links          | down           | right | 29,2                   | 19,1                  | 71,6        | 29,71                    | 114,55                | 1                   | 2                                       |                      | 2                        |                          |
| 25             | m                         | 37+6                   | 28+3               | links          | down           | right | 14,5                   | 3,7                   | 38,4        | 12,63                    | 88,76                 | 1                   | 2                                       |                      | 2                        |                          |
| 26             | f                         | 38+2                   | 24+2               | links          | down           | right | 8,5                    | 1                     | 31,4        | 8,66                     | 46,22                 | 1                   | 2                                       |                      | 2                        |                          |
| 27             | m                         | 38+3                   | 31+4               | links          | up             | right | 20,3                   | 0                     | 31,7        | 15,45                    | 169,47                | 1                   | 1                                       | 7,88                 | 2                        |                          |
| 28             | f                         | 36+0                   | 33+6               | links          | up             | right | 17,2                   | 0                     | 22          | 22,88                    | 178,75                | 2                   | 3                                       |                      | 1                        | 0,25                     |
| 29             | f                         | 37+2                   | 36+3               | links          | up             | right | 38,9                   | 8,8                   | 49,46       | 41,08                    | 192,03                | 1                   | 2                                       |                      | 2                        |                          |
| 30             | m                         | 38+3                   | 32+4               | links          | up             | right | 17,3                   | 0,81                  | 25,9        | 18,61                    | 118,71                | 1                   | 3                                       |                      | 1                        | 3                        |
| 31             | m                         | 38+2                   | 32+4               | links          | up             | right | 24,3                   | 4,4                   | 41          | 21,06                    | 197,94                | 1                   | 1                                       | 9                    | 2                        |                          |
| 32             | m                         | 38+0                   | 33+1               | links          | up             | right | 22                     | 7                     | 51,7        | 9,45                     | 106,96                | 1                   | 1                                       | 7,4                  | 2                        |                          |
| 33             | f                         | 35+0                   | 26+0               | links          | up             | right | 12,3                   | 0,1                   | 33,7        | 4,57                     | 41,74                 | 1                   | 1                                       | 7,3                  | 1                        | 7                        |
| 34             | f                         | 38+3                   | 31+4               | links          | up             | right | 19,5                   | 0                     | 30,4        | 17,1                     | 110,65                | 1                   | 2                                       |                      | 2                        |                          |
| 35             | f                         | 38+3                   | 30+0               | links          | down           | right | 21,8                   | 0                     | 39,4        | 17,99                    | 124,45                | 1                   | 2                                       |                      | 2                        |                          |
| 36             | m                         | 38+4                   | 27+3               | links          | down           | right | 8,2                    | 0                     | 40,9        | 17,69                    | 90,32                 | 1                   | 2                                       |                      | 2                        |                          |
| 37             | f                         | 37+1                   | 30+5               | links          | up             | right | 11,9                   | 0                     | 20,1        | 25,5                     | 141,07                | 1                   | 1                                       | 11                   | 2                        |                          |
| 38             | f                         | 38+3                   | 34+0               | links          | down           | right | 34,4                   | 7,6                   | 53,1        | 24,95                    | 196,15                | 1                   | 2                                       |                      | 2                        |                          |
| 39             | m                         | 38+5                   | 28+0               | links          | up             | right | 13,2                   | 11,5                  | 54,4        | 10,48                    | 44,88                 | 1                   | 2                                       |                      | 2                        |                          |
| 40             | m                         | 39+1                   | 32+3               | links          | up             | right | 48,99                  | 0                     | 47,9        | 28,75                    | 180,3                 | 1                   | 1                                       | 11,9                 | 2                        |                          |
| 41             | m                         | 38+6                   | 29+1               | links          | down           | right | 21,7                   | 7,5                   | 57,3        | 12,05                    | 107,41                | 1                   | 2                                       |                      | 2                        |                          |
| 42             | m                         | 38+0                   | 32+3               | links          | down           | right | 26,1                   | 0                     | 37,7        | 32,38                    | 191,49                | 1                   | 2                                       |                      | 2                        |                          |
| 43             | f                         | 38+4                   | 28+3               | links          | up             | right | 24,1                   | 6,7                   | 59,6        | 10,78                    | 73,31                 | 1                   | 2                                       |                      | 2                        |                          |
| 44             | m                         | 38+1                   | 29+0               | links          | up             | right | 13,6                   | 1,3                   | 29,7        | 14                       | 76,65                 | 1                   | 1                                       | 17,8                 | 1                        | 49,1                     |
| 45             | m                         | 38+3                   | 27+2               | links          | up             | right | 8,9                    | 0                     | 21,1        | 7,7                      | 62,76                 | 1                   | 1                                       | 20                   | 2                        |                          |
| 46             | f                         | 38+0                   | 28+2               | links          | down           | right | 33,4                   | 8,2                   | 88,9        | 15,77                    | 93,92                 | 1                   | 2                                       |                      | 2                        |                          |
| 47             | f                         | 37+3                   | 34+3               | links          | up             | right | 25,6                   | 0                     | 31,2        | 14,7                     | 152,97                | 1                   | 2                                       |                      | 2                        |                          |
| 48             | m                         | 38+4                   | 29+0               | links          | down           | right | 16,7                   | 0                     | 33,3        | 17,97                    | 96,7                  | 1                   | 2                                       |                      | 2                        |                          |
| 49             | f                         | 38+5                   | 24+5               | rechts         | up             | right | 11,5                   | 0                     | 36,2        | 6,57                     | 46,74                 | 1                   | 2                                       |                      | 2                        |                          |
| 50             | f                         | 39+0                   | 28+7               | rechts         | down           | right | 23                     | 1,1                   | 48          | 18,99                    | 137,38                | 1                   | 1                                       | 7,1                  | 2                        |                          |
| 51             | f                         | 39+6                   | 28+1               | links          | down           | right | 17,4                   | 0                     | 37,7        | 12,97                    | 89,84                 | 1                   | 2                                       |                      | 2                        |                          |
| 52             | m                         | 38+2                   | 28+5               | links          | up             | right | 11,7                   | 0                     | 24          | 10,82                    | 83,83                 | 1                   | 1                                       | 5,9                  | 2                        |                          |
| 53             | m                         | 38+5                   | 32+4               | links          | up             | right | 13                     | 0                     | 18,6        | 13,61                    | 108,08                | 1                   | 1                                       | 6,7                  | 1                        | 25,3                     |
| 54             | f                         | 37+6                   | 32+3               | links          | up             | right | 40,2                   | 0                     | 58,1        | 21,21                    | 160,92                | 1                   | 1                                       | 10,3                 | 2                        |                          |
| 55             | f                         | 37+1                   | 27+4               | links          | up             | right | 9,1                    | 0                     | 20,9        | 10,75                    | 75,29                 | 1                   | 1                                       | 10                   | 1                        | 10,2                     |
| 56             | f                         | 38+2                   | 34+0               | links          | down           | right | 26,9                   | 2,3                   | 36,4        | 26,21                    | 149,73                | 1                   | 2                                       |                      | 2                        |                          |
| 57             | f                         | 37+3                   | 28+3               | links          | up             | right | 16,3                   | 4,5                   | 43,8        | 11,16                    | 83,8                  | 1                   | 2                                       |                      | 1                        | 0,4                      |
| 58             | m                         | 38+2                   | 27+0               | links          | down           | right | 12,7                   | 0                     | 31          | 14,68                    | 78,28                 | 1                   | 2                                       |                      | 2                        |                          |
| 59             | m                         | 36+0                   | 31+6               | links          | down           | right | 21,6                   | 0                     | 32,9        | 11,89                    | 118,2                 | 1                   | 1                                       | ka                   | 2                        |                          |
| 60             | f                         | 38+1                   | 28+3               | links          | up             | right | 14,6                   | 0                     | 30,8        | 9,47                     | 84,45                 | 1                   | 1                                       | 8,5                  | 2                        |                          |
| 61             | f                         | 34+1                   | 33+0               | links          | up             | right | 8,1                    | 0                     | 11          | 19,57                    | 129,3                 | 1                   | 3                                       |                      | 1                        | 0,2                      |
| 62             | m                         | 38+6                   | 33+2               | links          | up             | right | 19                     | 18                    | 49,7        | 18,29                    | 131,89                | 1                   | 2                                       |                      | 2                        |                          |
| 63             | m                         | 39+0                   | 33+2               | links          | down           | right | 36                     | 3                     | 52,3        | 22,09                    | 141,52                | 1                   | 2                                       |                      | 2                        |                          |
| 64             | f                         | 34+0                   | 27+5               | links          | up             | right | 10,8                   | 2                     | 29          | 7,94                     | 68,48                 | 1                   | 2                                       |                      | 2                        |                          |
| 65             | m                         | 35+2                   | 31+0               | links          | up             | right | 18,1                   | 0                     | 29,8        | 14,09                    | 88,11                 | 1                   | 2                                       |                      | 2                        |                          |
| 66             | m                         | 38+0                   | 26+4               | links          | up             | right | 11                     | 0                     | 28          | 9,6                      | 65,04                 | 1                   | 2                                       |                      | 1                        | 29                       |
| 67             | m                         | 38+0                   | 33+0               | links          | down           | right | 41,5                   | 3,5                   | 61,9        | 16,34                    | 140,44                | 1                   | 2                                       |                      | 2                        |                          |
| 68             | f                         | 37+4                   | 33+4               | links          | up             | right | 31,06                  | 0                     | 40,7        | 24,11                    | 180,64                | 1                   | 1                                       | 10                   | 2                        |                          |
| 69             | m                         | 38+0                   | 28+0               | links          | up             | right | 8,82                   | 0                     | 19,4        | 9,28                     | 81,81                 | 1                   | 1                                       | 10                   | 1                        | 10                       |
| 70             | m                         | 38+3                   | 32+4               | links          | up             | right | 32,67                  | 0                     | 46,7        | 26,21                    | 178,34                | 1                   | 2                                       |                      | 2                        |                          |
| 71             | m                         | 38+3                   | 31+3               | links          | up             | right | 7,38                   | 0                     | 11,7        | 21,73                    | 94,9                  | 1                   | 1                                       | 4                    | 1                        | 6                        |
| 72             | m                         | 37+4                   | 31+3               | links          | up             | right | 24                     | 0                     | 38,6        | 12,63                    | 114,21                | 1                   | 2                                       |                      | 2                        |                          |
| 73             | m                         | 29+3                   | 24+4               | links          | up             | right | 6,6                    | 0                     | 21          | 5,66                     | 48,56                 | 1                   | 3                                       |                      | 1                        | 1                        |
| 74             | f                         | 37+5                   | 35+2               | links          | up             | right | 15,5                   | 0                     | 17,6        | 6,82                     | 92,94                 | 2                   | 1                                       | 12                   | 2                        |                          |
| 75             | f                         | 35+4                   | 29+4               | links          | up             | right | 12,3                   | 0                     | 23,3        | 7,1                      | 52,12                 | 1                   | 3                                       |                      | 1                        | 8                        |
| 76             | m                         | 37+4                   | 33+1               | links          | down           | right | 37,3                   | 9,8                   | 78          | 19,6                     | 130,23                | 1                   | 2                                       |                      | 2                        |                          |
| 77             | f                         | 36+3                   | 30+6               | links          | up             | right | 11,2                   | 0                     | 18,7        | 8,89                     | 125,1                 | 1                   | 3                                       |                      | 1                        | 1                        |
| 78             | m                         | 38+3                   | 30+0               | links          | up             | right | 22                     | 0                     | 40          | 16,45                    | 106,95                | 1                   | 2                                       |                      | 2                        |                          |

|     |   |      |      |       |      |       |       |      |       |       |        |   |   |    |   |    |
|-----|---|------|------|-------|------|-------|-------|------|-------|-------|--------|---|---|----|---|----|
| 79  | f | 37+6 | 34+2 | links | up   | right | 16,3  | 1,7  | 22,2  | 23,05 | 149,73 | 1 | 1 | 9  | 2 |    |
| 80  | m | 34+0 | 28+3 | links | up   | right | 11,6  | 4,4  | 33,7  | 8,18  | 89,29  | 1 | 2 |    | 2 |    |
| 81  | f | 38+4 | 34+5 | links | down | right | 25,01 | 0,1  | 29,89 | 21,26 | 147,21 | 1 | 1 | 9  | 1 | 9  |
| 82  | f | 38+1 | 36+1 | links | up   | right | 23,8  | 4,1  | 29,6  | 16,16 | 156,87 | 1 | 2 |    | 2 |    |
| 83  | f | 33+2 | 30+4 | links | up   | right | 15,7  | 2    | 30,3  | 14,01 | 90,66  | 1 | 2 |    | 2 |    |
| 84  | m | 38+0 | 29+1 | links | up   | right | 10,7  | 2    | 24,9  | 10,32 | 82,43  | 1 | 2 |    | 2 |    |
| 85  | f | 38+2 | 30+4 | links | up   | right | 12,1  | 0,3  | 21,2  | 9,34  | 100,34 | 1 | 1 | 11 | 2 |    |
| 86  | m | 38+2 | 33+4 | links | up   | right | 0,5   | 11,5 | 15,7  | 16,01 | 100,02 | 2 | 3 |    | 1 | 1  |
| 87  | m | 38+2 | 36+1 | links | down | right | 27,4  | 7,1  | 37    | 26,18 | 153,58 | 1 | 2 |    | 2 |    |
| 88  | m | 38+3 | 29+5 | links | down | right | 18,7  | 2,4  | 39,2  | 12,2  | 86,46  | 1 | 2 |    | 2 |    |
| 89  | m | 35+2 | 31+2 | links | up   | right | 17,9  | 2,3  | 32,4  | 19,34 | 118,06 | 1 | 1 | 8  | 1 | 31 |
| 90  | f | 38+0 | 35+6 | links | up   | right | 16,9  | 0,6  | 19    | 17,83 | 114,29 | 1 | 1 | 11 | 1 | 30 |
| 91  | m | 36+2 | 29+1 | links | up   | right | 9,6   | 1,4  | 21,6  | 17,33 | 81,6   | 1 | 3 |    | 1 | 2  |
| 92  | m | 40+1 | 23+0 | links | down | right | 7,1   | 0,9  | 30,9  | 5,81  | 30,15  | 1 | 2 |    | 2 |    |
| 93  | m | 37+5 | 35+5 | links | up   | right | 28    | 1,8  | 32,7  | 26,67 | 185,73 | 1 | 1 | 9  | 2 |    |
| 94  | m | 38+6 | 32+0 | links | up   | right | 18,9  | 3,4  | 33,5  | 20,76 | 91,15  | 1 | 2 |    | 2 |    |
| 95  | f | 34+0 | 29+0 | links | up   | right | 5,9   | 1    | 14,5  | 10,91 | 70,85  | 2 | 3 |    | 1 | 1  |
| 96  | f | 40+0 | 29+5 | links | up   | right | 15,4  | 3,2  | 34,5  | 18,02 | 76,38  | 1 | 2 |    | 2 |    |
| 97  | m | 36+6 | 29+3 | links | up   | right | 10,1  | 0,4  | 20    | 9,52  | 110,67 | 1 | 2 |    | 2 |    |
| 98  | f | 38+1 | 36+2 | links | up   | right | 15,8  | 2,9  | 19,6  | 23,12 | 132,07 | 1 | 2 |    | 2 |    |
| 99  | m | 38+6 | 26+0 | links | up   | right | 14,8  | 4,1  | 48,7  | 14    | 71,64  | 1 | 2 |    | 2 |    |
| 100 | f | 38+1 | 26+0 | links | up   | right | 14,8  | 3,3  | 49,2  | 14,35 | 77,76  | 1 | 2 |    | 2 |    |
| 101 | m | 38+1 | 32+1 | links | up   | right | 13,9  | 2,1  | 24    | 12,44 | 92,07  | 1 | 1 | 15 | 1 | 15 |
| 102 | f | 36+6 | 27+6 | links | down | right | 12,1  | 1,7  | 30,82 | 16,53 | 89,73  | 1 | 1 | 2  | 1 | 3  |
| 103 | f | 38+3 | 27+4 | links | down | right | 15,5  | 1,7  | 39    | 11,22 | 69,19  | 1 | 2 |    | 2 |    |
| 104 | m | 38+3 | 32   | links | up   | right | 18,5  | 3,7  | 33,35 | 15,46 | 91,62  | 1 | 2 |    | 2 |    |
| 105 | f | 38+2 | 29+1 | links | up   | right | 12,3  | 1,9  | 27,87 | 10,97 | 91,07  | 1 | 1 | 4  | 2 |    |
| 106 | m | 38+5 | 32+0 | links | up   | right | 6,9   | 1,2  | 12,2  | 14,16 | 111,74 | 1 | 1 | 12 | 2 |    |
| 107 | f | 38+1 | 28+4 | links | down | right | 16,9  | 5,3  | 46,1  | 8,9   | 53,15  | 1 | 3 |    | 1 | 1  |
| 108 | f | 37+2 | 34+0 | links | up   | right | 17,5  | 3,5  | 25,59 | 22,38 | 145,98 | 1 | 1 | 8  | 2 |    |
| 109 | m | 38+6 | 32+0 | links | down | right | 18,2  | 2    | 30,3  | 24,36 | 127,56 | 1 | 1 | 11 | 1 | 11 |
| 110 | m | 38+2 | 30   | links | up   | right | 9,8   | 1,5  | 25,6  | 9,47  | 61,86  | 1 | 3 |    | 1 | 2  |
| 111 | f | 37+2 | 32+0 | links | up   | right | 11,05 | 1,9  | 20,1  | 20,75 | 158,58 | 1 | 3 |    | 1 | 1  |
| 112 | f | 36+1 | 28+0 | links | up   | right | 13,6  | 1,4  | 35    | 14,65 | 89,46  | 1 | 2 |    | 2 |    |
| 113 | f | 38+5 | 34+1 | links | up   | right | 28,83 | 6,3  | 43,85 | 26,16 | 205,36 | 1 | 2 |    | 2 |    |
| 114 | m | 36+4 | 36+0 | links | up   | right | 19,4  | 2,2  | 23,2  | 18    | 121,27 | 1 | 2 |    | 2 |    |
| 115 | m | 38+3 | 28+0 | links | down | right | 12,19 | 2,6  | 32,08 | 17,87 | 93,85  | 1 | 2 |    | 2 |    |
| 116 | m | 34+4 | 31+1 | links | up   | right | 14,8  | 1,9  | 27,5  | 12,96 | 147,18 | 1 | 1 | 17 | 2 |    |
| 117 | f | 37+1 | 30+3 | links | down | right | 19,3  | 4,4  | 41,1  | 23,5  | 98,5   | 1 | 2 |    | 2 |    |
| 118 | m | 38+5 | 26+0 | links | down | right | 9,47  | 1,5  | 29,84 | 7,97  | 54,18  | 1 | 2 |    | 2 |    |
| 119 | m | 38+0 | 25+0 | links | up   | right | 7,7   | 2,78 | 31,89 | 10,62 | 43,49  | 1 | 2 |    | 2 |    |
| 120 | f | 37+4 | 28+1 | links | down | right | 14,34 | 4,2  | 40,2  | 13,07 | 83,9   | 1 | 2 |    | 2 |    |
| 121 | m | 37+2 | 29+3 | links | up   | right | 9,93  | 0,6  | 20,1  | 15,4  | 91,33  | 1 | 1 | 10 | 2 |    |
| 122 | m | 38+2 | 35+1 | links | up   | right | 35,7  | 12,3 | 55,2  | 32,27 | 154,33 | 1 | 2 |    | 2 |    |
